# Supplementary material for: Regenerative Activities of ROS-Modulating Trace Metals in Subcutaneously Implanted Biodegradable Cryogel
Source: MDPI journal article supplement (doi:10.3390/gels8020118), 2022-02-14
Supplement: s1 [file s1]

# Regenerative Activities of ROS-Modulating Trace Metals in Subcutaneously Implanted Biodegradable Cryogel

Abdulla A. Yergeshov <sup>1†</sup>, Mohamed Zoughaib <sup>1†</sup>, Rezeda A. Ishkaeva <sup>1</sup>, Irina N. Savina <sup>2</sup> and Timur I. Abdullin <sup>1,\*</sup>

<sup>1</sup> Institute of Fundamental Medicine and Biology, Kazan (Volga Region) Federal University, 18 Kremlyovskaya St., 420008 Kazan, Russia; abdulla.yergeshov@mail.ru (A.A.Y.); ZMokhamed@kpfu.ru (M.Z.); RezAAhmadishina@kpfu.ru (R.A.I.);

<sup>2</sup> School of Applied Sciences, University of Brighton, Huxley Building, Lewes Road, Brighton BN2 4GJ, UK;

I.N.Savina@brighton.ac.uk (I.N.S.)

\*Correspondence: tabdulli@gmail.com, timur.abdullin@kpfu.ru (T.I.A.)

<sup>†</sup> Authors with equal contribution.

**A**

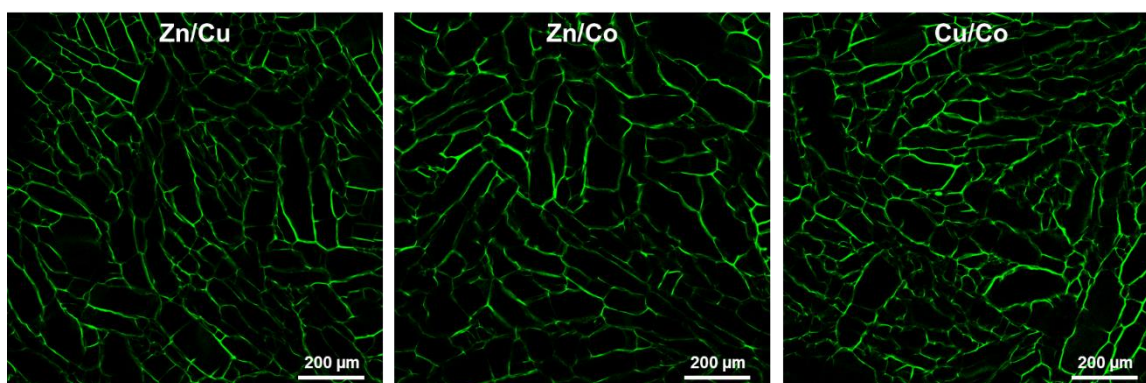

**B**

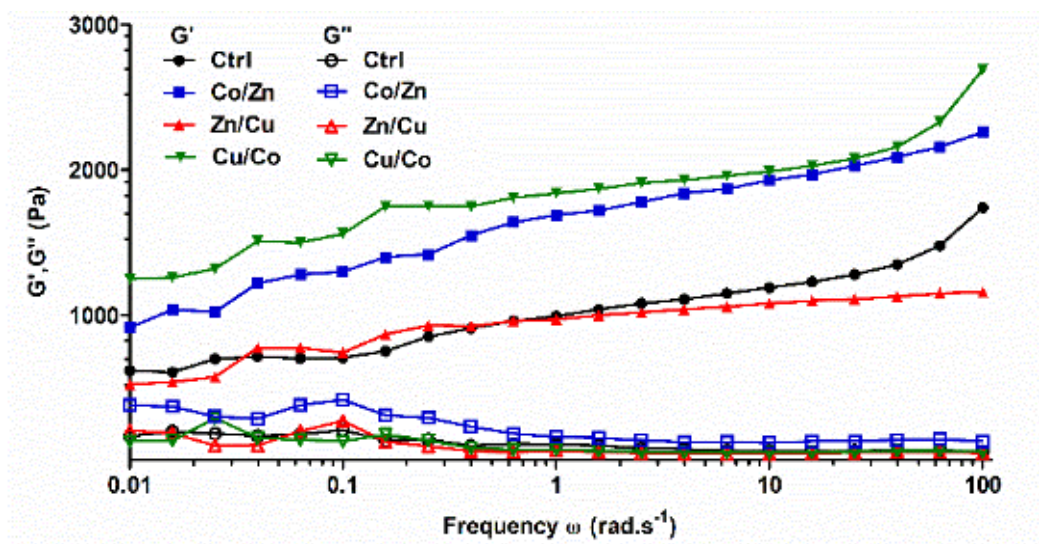

**Figure S1.** A. LSCM images of dual TM-doped cryogel sheets (top surface) visualized by autofluorescence upon argon laser excitation (488 nm). B. Frequency sweep test (strain deformation  $\delta = 1\%$ ) data for the cryogels. TM-doped cryogels (1 mM for each metal) were analyzed.



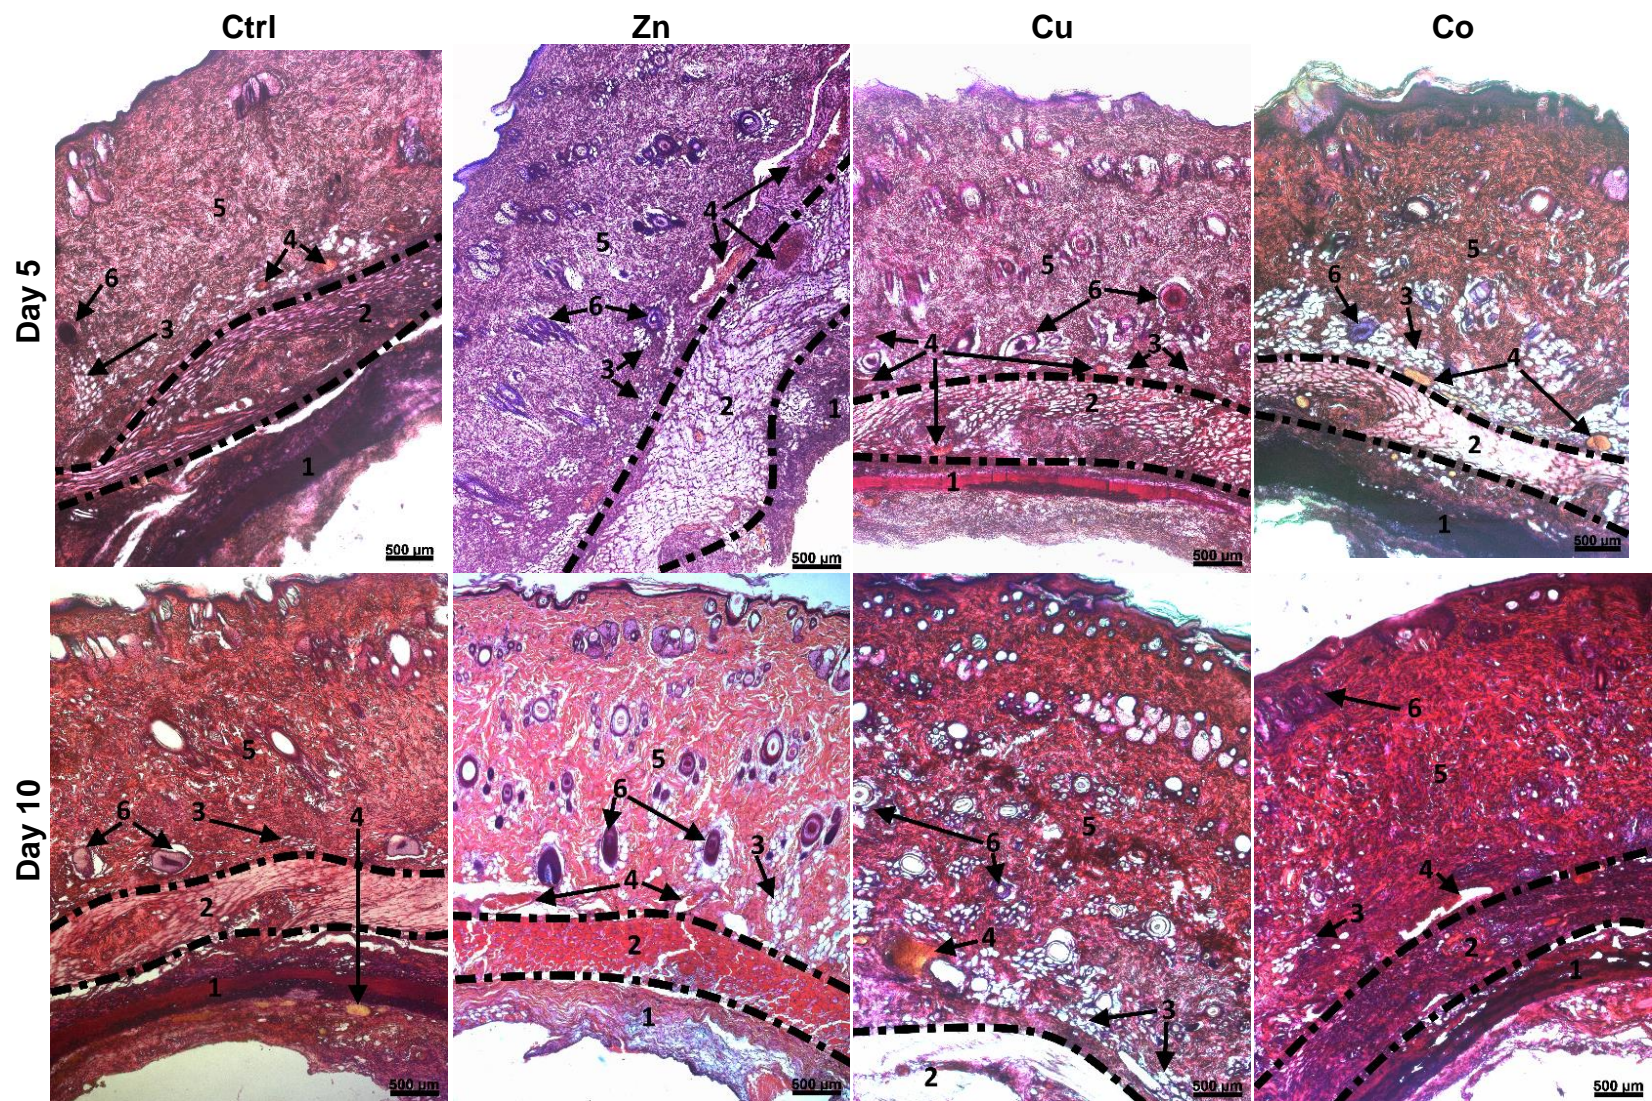

**Figure S2.** Representative bright-field microscopy images of H&E-stained cross-sections of skin explants contacted with subcutaneously implanted TM-doped cryogels.



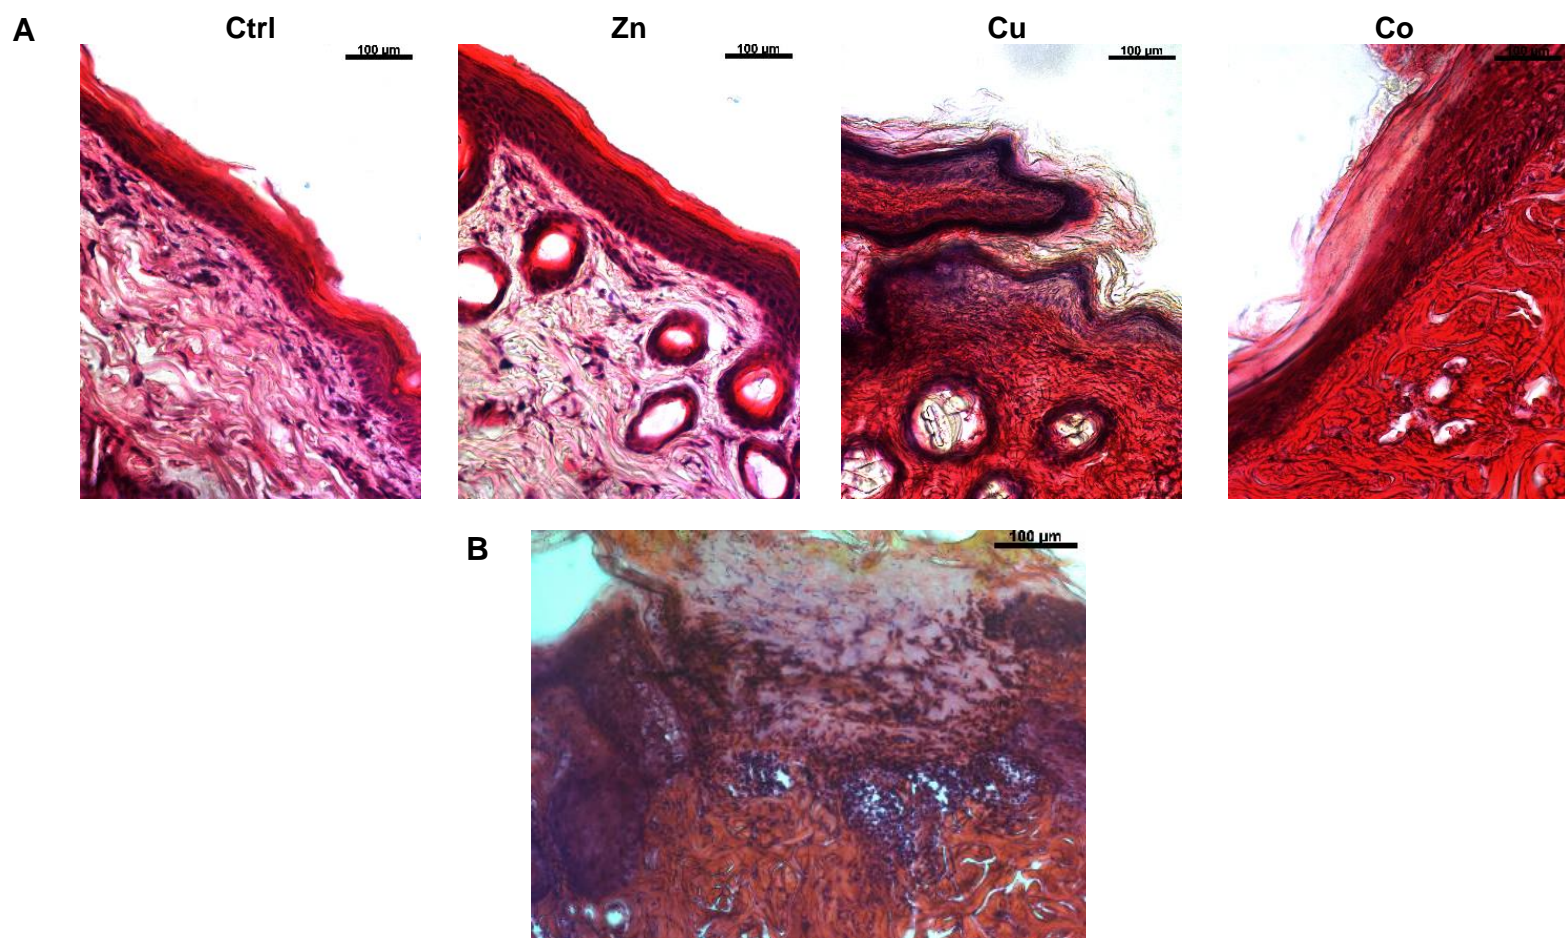

**Figure S3.** Visualization of epidermal layer of treated skin according to H&E staining. **A.** Representative bright-field microscopy images for non-doped and TM-doped cryogels. **B.** Localized area with dermatitis manifestations caused by Co-doped cryogel.

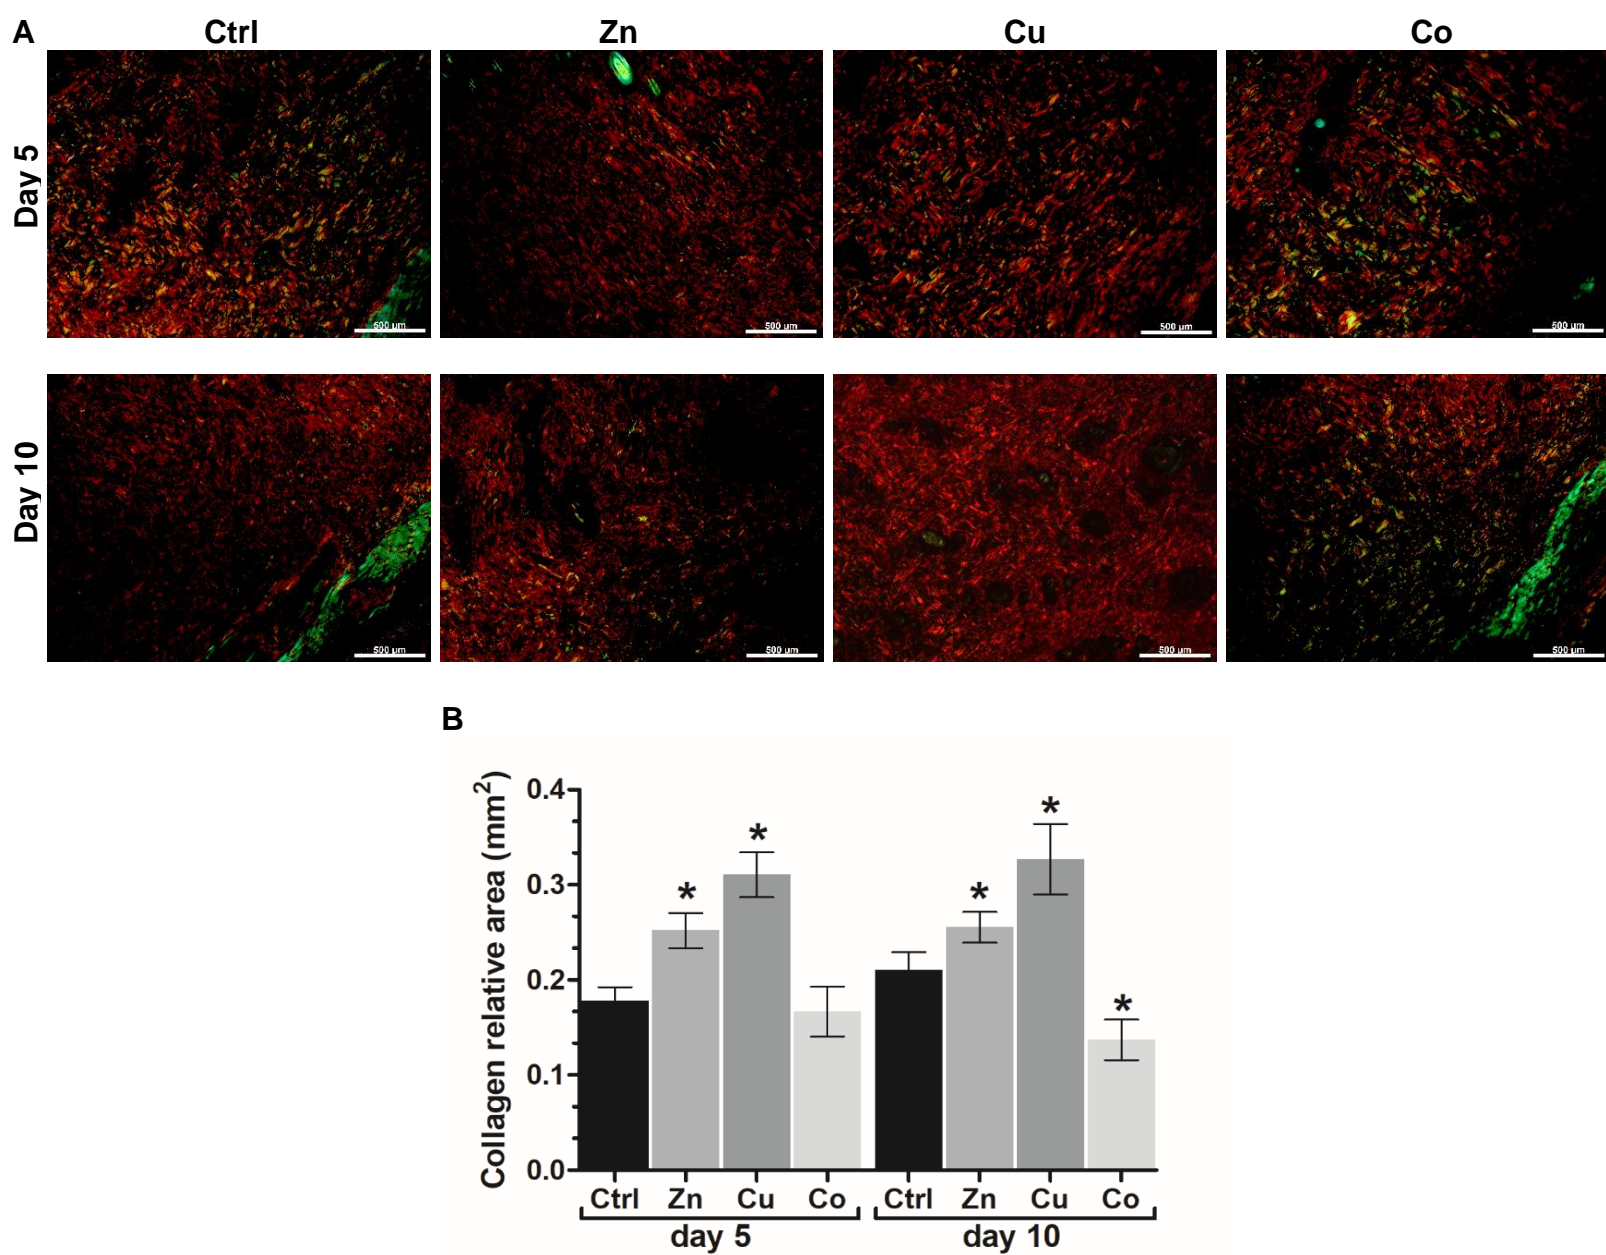

**Figure S4.** A. Representative polarization microscopy images of Picrosirius red-stained cross-sections of skin explants (dermal area) contacted with subcutaneously implanted TM-doped cryogels. B. Relative area of mature collagen per field of view (mean ± SD, \* $p < 0.05$ ). Red-yellow and green structures, respectively, correspond to mature and immature collagens [41].



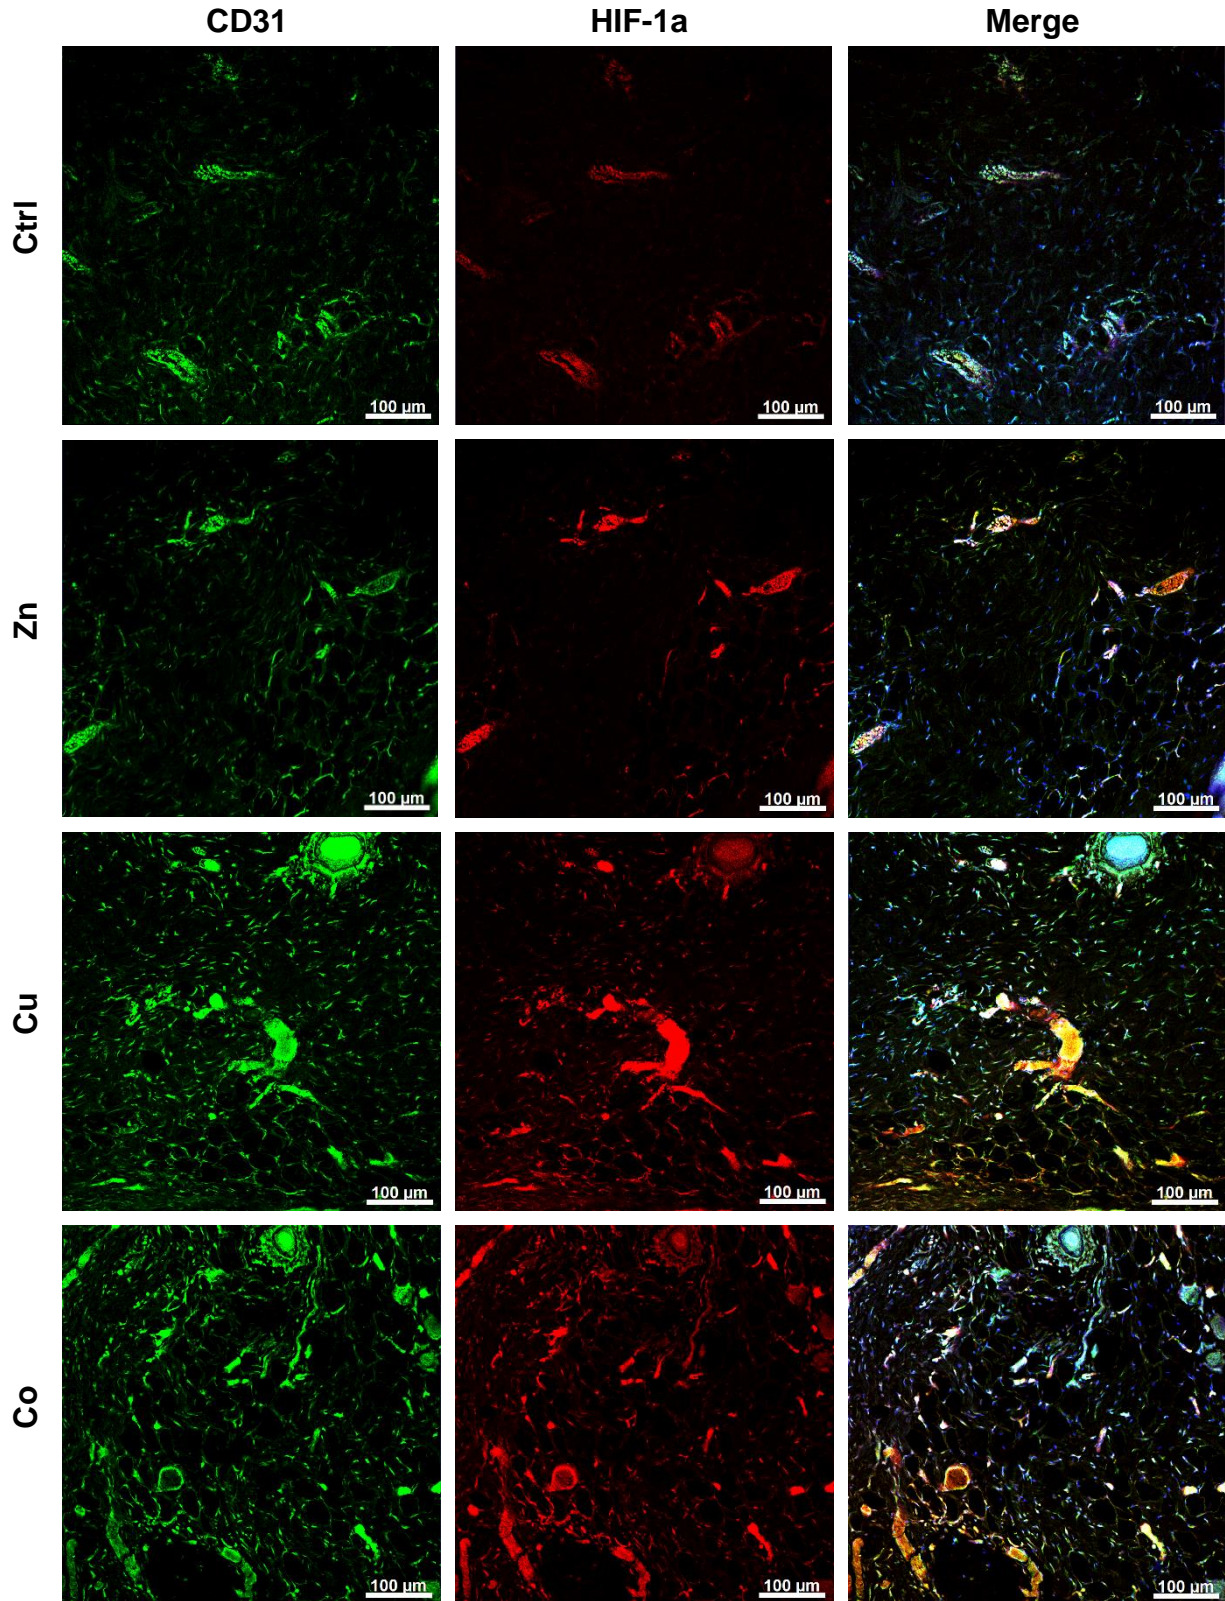

**Figure S5.** Immunofluorescent analysis of cross-sections of skin explants contacted with subcutaneously implanted TM-doped cryogels at day 5 (Zn and Cu) and day 10 (Ctrl and Co). Simultaneous CD31 CruzFluor™ 488 (green), HIF-1 $\alpha$  Alexafluor 647 (red) and DAPI staining was performed.



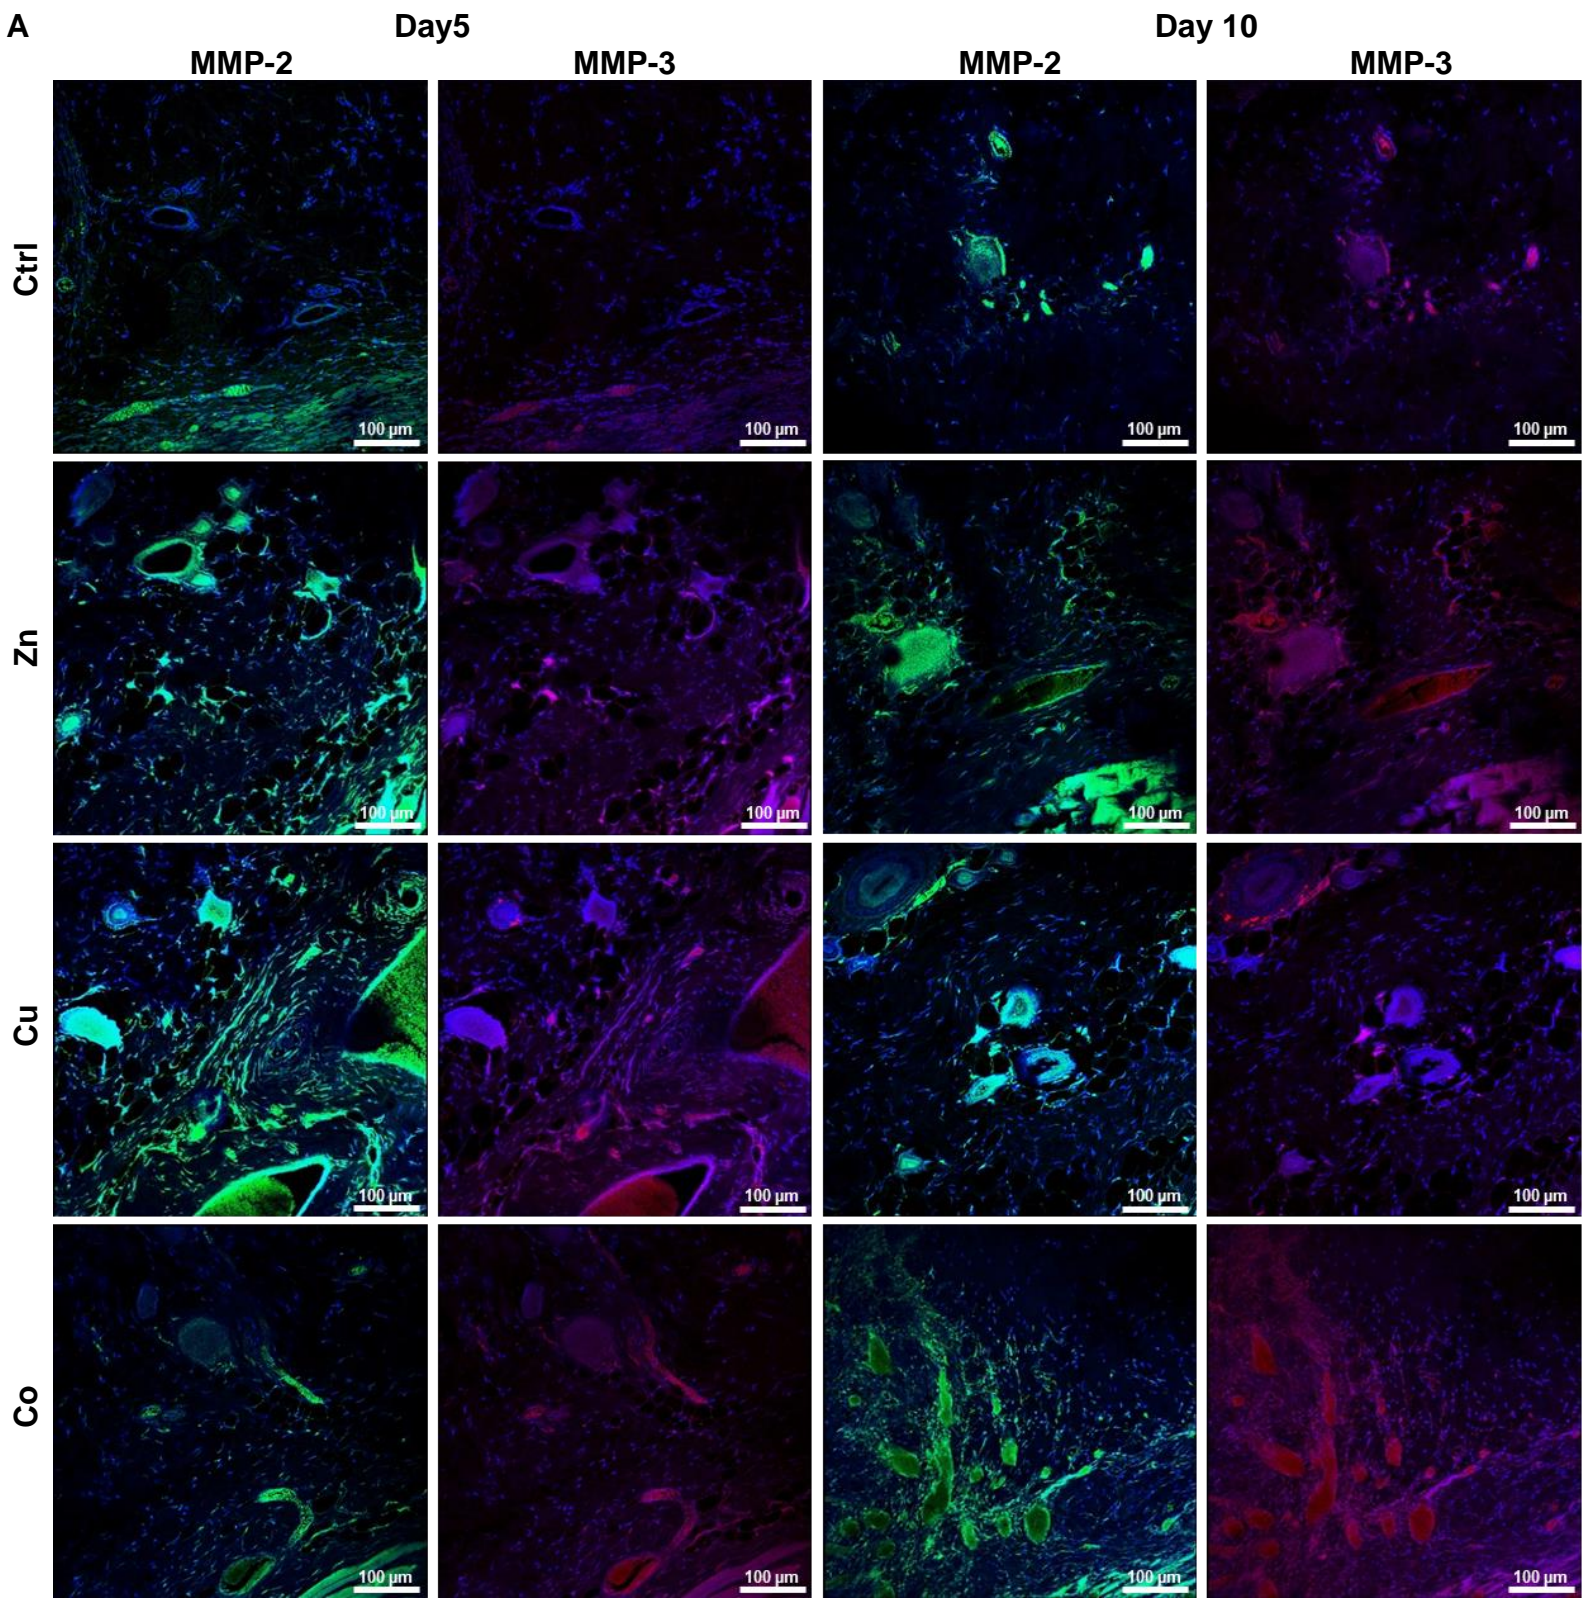

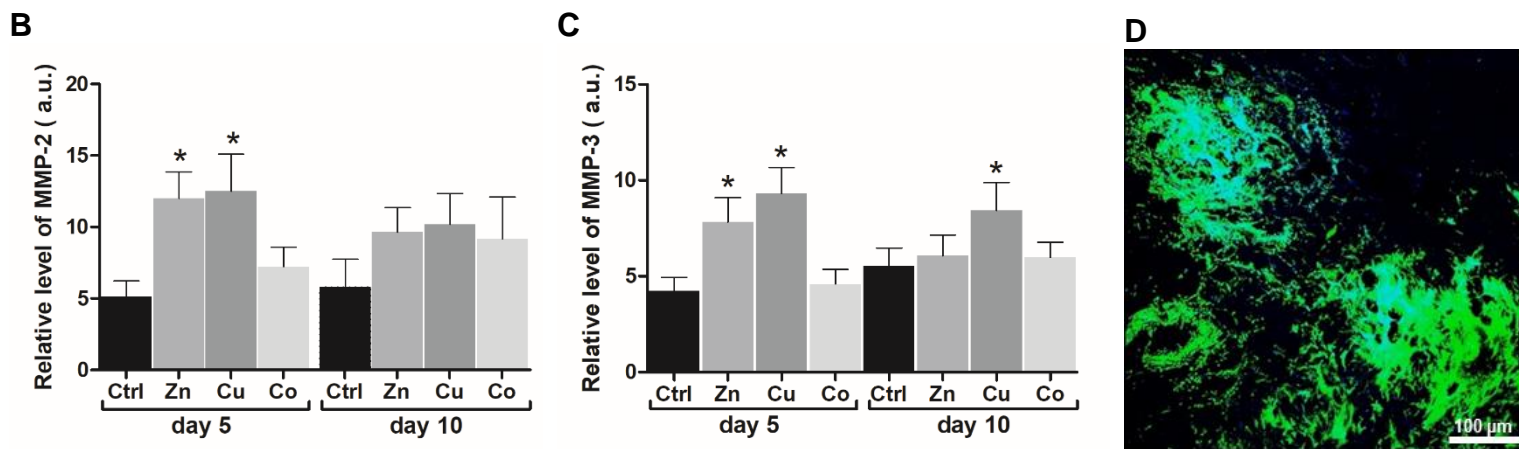

**Figure S6.** A. Immunofluorescent analysis of cross-sections of skin explants contacted with subcutaneously implanted TM-doped cryogels (MMP-2 AlexaFluor 488 (green) and MMP-3 Alexafluor 647 (red)). B, C – Relative MMP levels in the dermis per field of view (mean  $\pm$  SD, \* $p$  < 0.05). D. The area with localized giant cells (MMP-2, Co-doped cryogel).

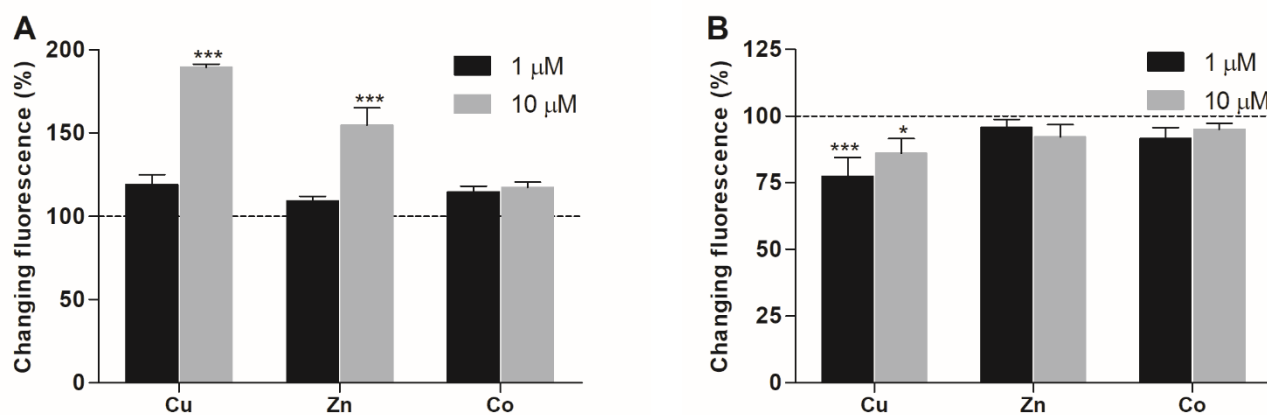

**Figure S7.** Effect of dissolved metals on relative levels of (A) ROS and (B) reduced glutathione in 3T3 fibroblasts according to DCFDA ( $\lambda_{ex}/\lambda_{em}$  = 490/526) and monochlorobimane ( $\lambda_{ex}/\lambda_{em}$  = 380/480) fluorescence, respectively. The cells were exposed to metal compounds for 1 h in HBSS. The values were presented as a relative fluorescence signal against the control cells with 100% fluorescence (mean  $\pm$  SD,  $n$  = 3, \* $p$  < 0.05, \*\*\* $p$  < 0.001).
